# Supplementary material
Source: PubMed Central journal article supplement (PMC3990646)
Supplement: NIHMS571053-supplement-supplement_1.pdf [file NIHMS571053-supplement-supplement_1.pdf]

**Supplementary Table S1. Ovarian cancer cell lines**

| Cell line                                                                  | Histology                                       | Characterization <sup>a</sup>                                                                        | Treatment(s) <sup>b</sup>                               | Xeno graft | Sequencing data <sup>c,d</sup> | Reference                                         |
|----------------------------------------------------------------------------|-------------------------------------------------|------------------------------------------------------------------------------------------------------|---------------------------------------------------------|------------|--------------------------------|---------------------------------------------------|
| <b>59M</b>                                                                 | Endometrioid                                    | Ascites                                                                                              | Naïve                                                   |            | X                              | (Wilson et al.)                                   |
| <b>138D</b>                                                                | Cystadeno-carcinoma                             | Ascites                                                                                              | Carboplatin                                             |            |                                | (Wilson et al.)                                   |
| <b>180D</b>                                                                | Adeno-carcinoma                                 | Ascites                                                                                              | Cisplatin, Carboplatin                                  |            |                                | (Wilson et al.)                                   |
| <b>200D</b>                                                                | Adeno-carcinoma                                 | Tumor tissue                                                                                         | Naïve                                                   |            |                                | (Wilson et al.)                                   |
| <b>253D</b>                                                                | Adeno-carcinoma                                 | Ascites                                                                                              | Warfarin, Cyclophosphamide, medroxyprogesterone acetate |            |                                | (Wilson et al.)                                   |
| <b>2008</b><br><b>2008 *C13<sup>†</sup></b>                                | Cystadeno-carcinoma                             | Tumor tissue<br>Constant 1 $\mu$ M                                                                   | Naïve                                                   |            |                                | (Andrews et al.)                                  |
| <b>A1847</b>                                                               | Adeno-carcinoma                                 | Tumor tissue                                                                                         | Naïve                                                   |            |                                | (Pirker et al.)                                   |
| <b>A2780</b><br><b>CP70*</b><br><b>C30*</b><br><b>C200*</b><br><b>ADR*</b> | Adeno-carcinoma                                 | Tumor tissue<br>Intermittent 70 $\mu$ M<br>Constant 30 $\mu$ M<br>Constant 200 $\mu$ M<br>Adriamycin | Naïve                                                   | Yes        | X                              | (Burbridge et al., Karlan et al., Shaw et al.)    |
| <b>Caov-3</b>                                                              | Adeno-carcinoma                                 | Tumor tissue                                                                                         | cyclophosphamide, adriamycin, and 5-fluorouracil        | Yes        | X                              | (Karlan et al.)                                   |
| <b>COLO704</b>                                                             | Adeno-carcinoma                                 | Ascites                                                                                              | Naïve                                                   |            | X                              | (Steinmeyer et al.)                               |
| <b>COLO720E</b>                                                            | Serous                                          | Ascites                                                                                              | Naïve                                                   |            |                                | (Taniguchi et al.)                                |
| <b>COV318</b>                                                              | Serous                                          | Ascites                                                                                              | Naïve                                                   |            | X                              | (van der Berg-Baker et al.)                       |
| <b>COV362</b><br><b>COV362.4</b>                                           | Endometrioid.<br>Colony of COV362 at passage 16 | Pleural effusion                                                                                     | Naïve                                                   |            | X                              | (van der Berg-Baker et al.)                       |
| <b>COV413A</b>                                                             | Serous                                          | Tumor tissue                                                                                         | Naïve                                                   |            |                                | (van der Berg-Baker et al.)                       |
| <b>COV413B</b>                                                             | Serous                                          | Tumor tissue                                                                                         | Naïve                                                   |            |                                | (van der Berg-Baker et al.)                       |
| <b>COV434</b>                                                              | Granulosa                                       | Tumor tissue                                                                                         | Naïve                                                   |            |                                | (van der Berg-Baker et al.)                       |
| <b>COV504</b>                                                              | Serous                                          | Pleural effusion                                                                                     | Naïve                                                   |            | X                              | (van der Berg-Baker et al.)                       |
| <b>DOV13</b>                                                               | Serous                                          | Ascites                                                                                              |                                                         | Yes        |                                | (Afzal et al., Ahmed et al., Rodriguez et al.)    |
| <b>EFO-21</b>                                                              | Adeno-carcinoma                                 | Ascites                                                                                              | Naïve                                                   |            | X                              | (Holzel et al.)                                   |
| <b>EFO-27</b>                                                              | Adeno-carcinoma                                 | Solid omental metastasis                                                                             | Naïve                                                   |            | X                              | (Holzel et al.)                                   |
| <b>ES-2</b>                                                                | Clear Cell                                      | Tumor tissue                                                                                         | Naïve                                                   | Yes        | X                              | (Lau et al., Shaw et al.)                         |
| <b>Hey</b><br><b>A8<sup>†</sup></b><br><b>C2<sup>†</sup></b>               | Serous                                          | Tumor tissue xenograft                                                                               | Naïve                                                   | Yes        | X                              | (Buick et al.)                                    |
| <b>ID-8, IG10, IF5</b>                                                     | Mouse transformed ovary                         | Line developed from transformed mouse ovarian surface epithelial cells                               | Naïve                                                   | Yes        |                                | (Roby et al.)<br>(Greenaway et al., Urzua et al.) |
| <b>IGROV-I</b>                                                             | Endometrioid                                    | S:III, Tumor tissue                                                                                  | Naïve                                                   |            | X                              | (Benard et al., Burbridge et al.)                 |

|                 |                         |                                                                   |                                                                          |         |   |                                                                        |
|-----------------|-------------------------|-------------------------------------------------------------------|--------------------------------------------------------------------------|---------|---|------------------------------------------------------------------------|
| <b>MDAH2774</b> | Endometrioid            | Ascites                                                           | Naïve                                                                    | Yes     |   | (Freedman et al.)                                                      |
| <b>MOSE</b>     | Mouse normal ovary      | Mouse Ovarian tissue                                              | Naïve                                                                    |         |   | (Roby et al.)                                                          |
| <b>MONTY1</b>   | Serous                  | Tissue                                                            | Naïve                                                                    | Yes     |   | (Kaur et al.)                                                          |
| <b>OAW-28</b>   | Adeno-carcinoma         | Ascites                                                           | Cisplatin, Melphalan                                                     |         | X | (Wilson et al.)                                                        |
| <b>OAW-42</b>   | Cystadeno-carcinoma     | Ascites - forms free-floating, platinum sensitive cysts in vitro. | Cisplatin                                                                |         | X | (Ahmed et al., Wilson et al.)                                          |
| <b>OC314</b>    | Serous-papillary cancer | Ascites. 39 yrs, FIGO IIIC, low differentiated ser.-pap           | Naïve                                                                    |         | X | (Alama et al.)                                                         |
| <b>OC316</b>    | Adeno-carcinoma         | Ascites. 60 yrs old, FIGO IV, low differentiated                  | Neo-adjuvant PEC-surgery-PEC, progression/chemo-resistant disease, taxol |         | X | (Alama et al.)                                                         |
| <b>OV17R</b>    | Adeno-carcinoma         | S:III, Ascites                                                    | Carboplatin, Cyproterone, Tamoxifen                                      |         |   | (Boocock et al.)                                                       |
| <b>OV25</b>     | Adeno-carcinoma         | S:III, Ascites                                                    | Cyclophosphamide, Etoposide, Tamoxifen                                   |         |   | (Boocock et al.)                                                       |
| <b>OV25R</b>    | Adeno-carcinoma         | S:III, Ascites                                                    | Cyclophosphamide, Etoposide, Tamoxifen                                   |         |   | (Boocock et al.)                                                       |
| <b>OV56</b>     | Serous                  | S:IV, Ascites                                                     | Carboplatin                                                              |         | X | (Boocock et al.)                                                       |
| <b>OV58</b>     | Serous                  | S:III, Ascites                                                    | Carboplatin, Chlorambucil                                                |         |   | (Boocock et al.)                                                       |
| <b>OV7</b>      | Mixed                   | Tumor tissue, high grade                                          | Chlorambucil                                                             |         | X | (Boocock et al.)                                                       |
| <b>OV90</b>     | Serous                  | S:IIIC, G:3, Ascites                                              | Naïve                                                                    | Yes     | X | (Boocock et al.)                                                       |
| <b>OVCA429</b>  | Serous                  | Ascites                                                           |                                                                          | No      |   | (Ahmed et al., Introna et al., Shaw et al.)                            |
| <b>OVCA433</b>  | Serous                  | S:III, G:3, Ascites                                               | Paclitaxel, carboplatin                                                  | Yes     |   | (Ahmed et al., Introna et al., Shaw et al., van der Berg-Baker et al.) |
| <b>OVCAR-3</b>  | Serous adeno-carcinoma  | Ascites, NCI 60 cell line <sup>d</sup>                            | Cyclophosphamide, Adriamycin, Cisplatin                                  | Yes     | X | (Green et al., Hamilton et al., Yip et al.)                            |
| <b>OVCAR-4</b>  | Adeno-carcinoma         | Ascites, NCI 60 cell line <sup>d</sup>                            | Cyclophosphamide, Adriamycin, Cisplatin                                  | Yes     | X | (Green et al., Yip et al.)                                             |
| <b>OVCAR-5</b>  | Adeno-carcinoma         | Tumor tissue, NCI 60 cell line <sup>d</sup>                       | Naïve                                                                    | Yes     |   | (Yip et al.)                                                           |
| <b>OVMANA</b>   | Clear cell              | Tumor tissue. 40 yrs old. FIGO IIB                                | Cisplatin                                                                | Yes, sq | X | (Cheung et al., Gorai et al.)                                          |
| <b>OVISE</b>    | Clear cell              | Tumor tissue                                                      | Carboplatin                                                              | Yes, sq | X | (Cheung et al., Gorai et al.)                                          |
| <b>OVTOKO</b>   | Clear cell              | Tumor tissue (spleen), FIGO IIIB                                  | Carboplatin                                                              |         | X | (Cheung et al., Gorai et al.)                                          |
| <b>PEO23</b>    | Adeno-carcinoma         | Ascites                                                           | Cisplatin,                                                               |         |   | (Langdon et al.)                                                       |

|                                                                                           |                                              |                                                                                                 |                                                |     |   |                                                                                                             |
|-------------------------------------------------------------------------------------------|----------------------------------------------|-------------------------------------------------------------------------------------------------|------------------------------------------------|-----|---|-------------------------------------------------------------------------------------------------------------|
|                                                                                           |                                              |                                                                                                 | Chlorambucil                                   |     |   |                                                                                                             |
| <b>RMUG-S</b><br><b>RMUG-L</b>                                                            | Adeno-carcinoma                              |                                                                                                 |                                                |     | X | (Sakayori et al.)                                                                                           |
| <b>SKOV3</b><br><b>SKOV3ip.1</b><br><b>SKOV3x</b><br><b>SKOV3TR</b><br>(taxane resistant) | Adeno-carcinoma                              | Ascites, NCI 60 cell line <sup>d</sup>                                                          | Thiotepa                                       | Yes | X | (Hua et al., Shaw et al., Yip et al.)<br>SKOV3ip.1 (Yu et al.) SKOV3x (Shao et al.) SKOV3TR (Landen et al.) |
| <b>SW 626</b>                                                                             | Adeno-carcinoma                              | S:III, Tumor tissue                                                                             | Naïve                                          |     |   | (Giannakakou et al.)                                                                                        |
| <b>TOV112D</b>                                                                            | Endometrioid                                 | S:IIIC, G:3, Tumor tissue. P53 mutation. Very aggressive, 42 yr old pt. survived only 3 months. | Naïve                                          | Yes | X | (Provencher et al.)                                                                                         |
| <b>TOV21G</b>                                                                             | Clear cell                                   | S:III, G:3, Tumor tissue. 42 yr old pt. P53 wt.                                                 | Naïve                                          | Yes | X | (Provencher et al.)                                                                                         |
| <b>TR175</b>                                                                              | Cystadeno-carcinoma                          | S:III, Ascites                                                                                  | Naïve                                          |     |   | (Hill et al.)                                                                                               |
| <b>TYK-nu</b>                                                                             | Clear cell                                   | Cisplatin sensitive                                                                             | Naïve                                          | Yes | X | (Cheung et al.)                                                                                             |
| <b>UCI101</b>                                                                             | Adeno-carcinoma                              | S:III, Ascites/ Tumor tissue                                                                    | Cyclophosphamide, Adriamycin, Cisplatin, Taxol |     |   | (Fuchtnet et al.)                                                                                           |
| <b>UWB1.289</b><br><b>UWB1.289+BRCA1</b>                                                  | Serous, mutated BRCA1 exon 11 BRCA1 restored | Tumor tissue                                                                                    | Platinum Refractory                            |     |   | (DelloRusso et al.)                                                                                         |

<sup>a</sup> Stage, S; Grade, G; Tumor, cell line derived from solid tumor tissue; Ascites, cell line derived from ascetic fluid.

<sup>b</sup> Treatments were done before initial derivation of cell line. \*Sub-lines of A2780. †Sub-lines of Hey.

<sup>‡</sup>Sub-lines of 2008.

<sup>c</sup> Sequencing information at <http://www.broadinstitute.org/ccle/home> and published by Barretina and colleagues (Barretina et al.). This website contains sequencing information on 50 ovarian cancer cell lines

<sup>d</sup> Sequencing information for the NCI 60 celllines is available at <http://discover.nci.nih.gov/cellminer/home.do>

## References

1. Afzal, S. et al., 1985, MTI-MMP and MMP-2 mRNA expression in human ovarian tumors: possible implications for the role of desmoplastic fibroblasts: Human Pathology, v. 29, p. 155-180.
2. Ahmed, N. et al., 2002, Overexpression of avb6 integrin in serous epithelial ovarian cancer regulates extracellular matrix degradation via the plasminogen activation cascade: Carcinogenesis, v. 23, no. 2, p. 237-244.
3. Alama, A. et al., 1996, Establishment and characterization of three new cell lines derived from the ascites of human ovarian carcinomas: Gynecologic Oncology, v. 62, p. 82-88.
4. Andrews, P. et al., 1985, Differential potentiation of alkylating and platinating agent cytotoxicity in human ovarian carcinoma cells by glutathione depletion: Cancer Research, v. 45, p. 6250-6253.
5. Barretina, J. et al., 2012, The cancer cell line encyclopedia enables predictive modeling of anticancer drug sensitivity: Nature, v. 483, p. 603-607.

6. Benard, J. et al., 1985, Characterization of a human ovarian adenocarcinoma line, IGROV1, in tissue culture and in nude mice: *Cancer Research*, v. 45, p. 4970-4979.
7. Boockock, C. A. et al., 1995, Expression of vascular endothelial growth factor and its receptors flt and KDR in ovarian carcinoma: *Journal of the National Cancer Institute*, v. 87, no. 7, p. 506-516.
8. Buick, R. N. et al., 1985, Comparative properties of five human ovarian adenocarcinoma cell lines: *Cancer Research*, v. 45, p. 3668-3676.
9. Burbridge, M. et al., 1999, Biological and pharmacological characterisation of three models of human ovarian carcinoma established in nude mice: Use of the CA125 tumour marker to predict antitumour activity: *International Journal of Oncology*, v. 15, p. 1155-1162.
10. Cheung, H. W. et al., 2011, Systematic investigation of genetic vulnerabilities across cancer cell lines reveals lineage-specific dependencies in ovarian cancer: *Proceedings of the National Academy of Sciences USA*, v. 108, no. 30, p. 12372-12377.
11. DelloRusso, C. et al., 2013, Functional characterization of a novel BRCA1-null ovarian cancer cell line in response to ionizing radiation: *Molecular Cancer Research*, v. 5, p. 35-45.
12. Freedman, R. S. et al., 1978, Characterization of an ovarian carcinoma cell line: *Cancer*, v. 42, no. 5, p. 2352-2359.
13. Fuchtnr, C. et al., 1993, Characterization of a human ovarian carcinoma cell lines: *Gynecologic Oncology*, v. 48, no. 2, p. 203-209.
14. Giannakakou, P. et al., 1997, Paclitaxel-resistant human ovarian cancer cells have mutant  $\beta$ -tubulins that exhibit impaired paclitaxel-driven polymerization: *Journal of Biological Chemistry*, v. 272, no. 27, p. 17118-17125.
15. Gorai, I. et al., 1995, Establishment of two human ovarian clear cell adenocarcinoma lines from metastatic lesions with different properties: *Gynecologic Oncology*, v. 57, p. 33-46.
16. Green, J. A. et al., 1984, Potentiation of melphalan cytotoxicity in human ovarian cancer cell lines by glutathione depletion: *Cancer Research*, v. 44, p. 5427-5431.
17. Greenaway, J. et al., 2008, Epithelial-stromal interaction increases cell proliferation, survival and tumorigenicity in a mouse model of human epithelial ovarian cancer: *Gynecologic Oncology*, v. 108, p. 385-394.
18. Hamilton, T. C. et al., 1983, Characterization of a human ovarian carcinoma cell line (NIH:OVCA-3) with androgen and estrogen receptors: *Cancer Research*, v. 43, p. 5379-5389.
19. Hill, B. T. et al., 1987, Establishment and characterization of three new human ovarian carcinoma cell lines and initial evaluation of their potential in experimental chemotherapy studies: *International Journal of Cancer*, v. 39, p. 219-225.
20. Holzel, F. et al., 1983, Cell lines derived from human ovarian carcinomas: Growth stimulation by gonadotropic and steroid hormones: *Journal of the National Cancer Institute*, v. 70, p. 839-845.
21. Hua, W. et al., 1995, SKOV3 ovarian carcinoma cells have functional estrogen receptor but are growth resistant to estrogens and antiestrogens: *J Steroid Biochem Molec Biol*, v. 55, p. 279-289.
22. Introna, M., and R. C. Bast, 1985, Epithelial ovarian carcinoma: Cell lines and antigenic tumor markers., in JMA Whitehouse and C. Williams ed., *Cancer of the female reproductive system*: John Wiley and Sons, p. 153-180.
23. Karlan, B. Y. et al., 1994, Glucocorticoids stabilize HER-2/neu messenger RNA in human epithelial ovarian carcinoma cells: *Gynecologic Oncology*, v. 53, p. 70-77.
24. Kaur, S. et al., 2009,  $\beta$ 3-integrin expression on tumor cells inhibits tumor progression, reduces metastasis, and is associated with a favorable prognosis in patients with ovarian cancer: *American Journal of Pathology*, v. 175, no. 5, p. 2184-2196.
25. Landen, C. N. et al., 2010, Targeting aldehyde dehydrogenase cancer stem cells in ovarian cancer: *Molecular Cancer Therapeutics*, v. 9, no. 12, p. 3186-3199.
26. Langdon, S. P. et al., 1988, Characterization and properties of 9 human ovarian carcinoma cell lines: *Cancer Research*, v. 48, p. 6166-6172.
27. Lau, D. H. M. et al., 1991, Multifactorial mechanisms associated with broad cross-resistance of ovarian carcinoma cells selected by cyanomorpholino doxorubicin: *Cancer Research*, v. 51, p. 5181-5187.
28. Pirker, R. et al., 1985, Characterization of immunotoxins active against ovarian cancer cell lines: *Immunotox against ovarian cancer*, v. 76, p. 1261-1267.

29. Provencher, D. M. et al., 200, Characterization of four novel epithelial ovarian cancer cell lines: *In Vitro Cell Dev Biol Anim*, v. 36, no. 6, p. 357-361.
30. Roby, K. F. et al., 2000, Development of a syngeneic mouse model for events related to ovarian cancer: *Carcinogenesis*, v. 21, no. 4, p. 585-591.
31. Rodriguez, G. C. et al., 1999, Epidermal growth factor receptor expression in normal ovarian epithelium and ovarian cancer: *American Journal of Obstetrics and Gynecology*, v. 164, no. 3, p. 745-750.
32. Sakayori, M. et al., 1990, Biological properties of two newly established cell lines (RMUG-S, RMUG-L) from a human ovarian mucinous cystadenocarcinoma: *Human Cell*, v. 3, p. 52-56.
33. Shao, M. et al., 2009, Epithelial-to-mesenchymal transition and ovarian tumor progression induced by tissue transglutaminase: *Cancer Research*, v. 69, no. 24, p. 9192-9201.
34. Shaw, T. J. et al., 2006, Characterization of intraperitoneal, orthotopic, and metastatic xenograft models of human ovarian cancer: *Molecular Therapy*, v. 10, p. 1032-1042.
35. Steinmeyer, C. et al., 2003, The expression of hCG receptor mRNA in four human ovarian cancer cell lines varies considerably under different experimental conditions: *Tumour Biol*, v. 24, p. 13-22.
36. Taniguchi, T. et al., 2003, Disruption of the fanconi anemia-BRCA pathway in cisplatin-sensitive ovarian tumors: *Nature Medicine*, v. 9, p. 568-574.
37. Urzua, U. et al., 2010, Microarray proteomic analysis discriminates tumorigenic mouse ovarian surface epithelial cells of divergent aggressive potential: *Molecular Biosystems*, v. 6, no. 12, p. 2521-2528.
38. van der Berg-Baker, C. A. et al., 1993, Establishment and characterization of 7 ovarian carcinoma cell lines and one granulosa tumor cell line: Growth features and cytogenetics: *International Journal of Cancer*, v. 53, no. 4, p. 613-620.
39. Wilson, A. P. et al., 1996, Characterisation of seven human ovarian tumour cell lines: *British Journal of Cancer*, v. 74, p. 722-727.
40. Yip, K. W. et al., 2006, Potential use of alexidine dihydrochloride as an apoptosis-promoting anticancer agent: *Molecular Cancer Therapeutics*, v. 5, no. 9, p. 2234-2240.
41. Yu, D. et al., 1992, Enhanced *c-erb B-2/neu* expression in human ovarian cancer cells correlates with more severe malignancy that can be suppressed by E1A: *Cancer Research*, v. 53, p. 891-898.

**Supplementary Table S2. Ovarian Cancer Stem Cell Marker**

| <b>Marker</b>                       | <b>Normal function(s)</b>                                                                 | <b>Proposed OC function(s)</b>                                                           | <b>Reference(s)</b>              |
|-------------------------------------|-------------------------------------------------------------------------------------------|------------------------------------------------------------------------------------------|----------------------------------|
| CD117<br>(c-KIT)                    | Hematopoietic cell survival, proliferation, differentiation                               | Cancer stemness, tumor proliferation, metastasis, angiogenesis                           | (Inoue et al., Zhang et al.)     |
| CD44                                | Cell adhesion, hyaluronate degradation, lymphocyte homing                                 | Cancer stemness, mesothelium binding, Nanog activation, cytoskeletal activation of MDR-1 | (Alvero et al., Zhang et al.)    |
| CD133<br>(PROM1)                    | Hematopoiesis, tissue development, differentiation                                        | Cancer stemness, metastasis, angiogenesis                                                | (Baba et al., Curley et al.)     |
| MyD88                               | Immune response, inflammation                                                             | Chemoresistance, proliferation                                                           | (Alvero et al.)                  |
| CD24                                | Self-renewal, differentiation                                                             | Cancer stemness, quiescence, chemoresistance                                             | (Gao et al., Kristiansen et al.) |
| LIN28                               | Stem cell self-renewal, maintenance of pluripotency                                       | Cancer stemness, dedifferentiation                                                       | (Peng et al.)                    |
| Oct4                                | Maintenance of pluripotency, stem cell self-renewal                                       | Cancer stemness, dedifferentiation                                                       | (Hu et al., Peng et al.)         |
| ALDH1<br>(Aldehyde dehydrogenase 1) | Metabolism of aldehydes, alcohol oxidation, differentiation (generation of retinoic acid) | Cancer stemness, tumor development                                                       | (Deng et al., Landen et al.)     |

## References

1. Alvero, A. B. et al., 2009, Molecular phenotyping of human ovarian cancer stem cells unravels the mechanisms for repair and chemoresistance: *Cell Cycle*, v. 8, p. 158-166.
2. Baba, T. et al., 2009, Epigenetic regulation of CD133 and tumorigenicity of CD133+ ovarian cancer cells: *Oncogene*, v. 28, p. 209-218.
3. Curley, M. D. et al., 2009, CD133 expression defines a tumor initiating cell population in primary human ovarian cancer: *Stem Cells*, v. 27, p. 2875-2883.
4. Deng, S. et al., 2010, Distinct expression levels and patterns of stem cell marker, aldehyde dehydrogenase isoform 1 (ALDH1), in human epithelial cancers: *PLoS One*, v. 5, p. e10277.
5. Gao, M. Q. et al., 2010, CD24(+) cells from hierarchically organized ovarian cancer are enriched in cancer stem cells: *Oncogene*, v. 29, p. 2672-2680.
6. Hu, L. et al., 2010, Ovarian cancer stem-like population cells are tumorigenic and chemoresistant: *British Journal of Cancer*, v. 102, p. 1276-1283.
7. Inoue, M. et al., 1994, Coexpression of the c-kit receptor and the stem cell factor in gynecological tumors: *Cancer Research*, v. 54, p. 3049-3053.
8. Kristiansen, G. et al., 2002, CD24 is expressed in ovarian cancer and is a new independent prognostic marker of patient survival: *American Journal of Pathology*, v. 161, p. 1215-1221.
9. Landen, C. N. et al., 2010, Targeting aldehyde dehydrogenase cancer stem cells in ovarian cancer: *Molecular Cancer Therapeutics*, v. 9, no. 12, p. 3186-3199.
10. Peng, S. et al., 2010, Pluripotency factors Lin28 and Oct4 identify a sub-population of stem cell-like cells in ovarian cancer: *Oncogene*, v. 29, p. 2153-2159.
11. Zhang, S. et al., 2008, Identification and characterization of ovarian cancer-initiating cells from primary human tumors: *Cancer Research*, v. 68, no. 11, p. 4311-5507.

**Supplementary Table S3. Summary of all Published Genetic Engineered Mouse Models of Ovarian Cancer**

| Reference                     | Year | Gene Alterations                                                                     | Site Specific Delivery                                                                            | Phenotype                                                                                                                             | Comments                                                                                                                                             |
|-------------------------------|------|--------------------------------------------------------------------------------------|---------------------------------------------------------------------------------------------------|---------------------------------------------------------------------------------------------------------------------------------------|------------------------------------------------------------------------------------------------------------------------------------------------------|
| (Wu et al.)                   | 2013 | <i>Pten/APC/p53<sup>R172H</sup>/PIK3ca</i>                                           | Adeno-Cre injection in bursa (Flesken-Nikitin et al.)                                             | Endometrioid ovarian tumors, ascites, metastasis                                                                                      | Mutant p53 and mutation in <i>PIK3ca</i> shorten survival and increase metastasis in beta-catenin and Pten dependent endometrioid tumors.            |
| (Szabova et al.)              | 2012 | <i>p53/p53<sup>R172H</sup>/Rb<sup>T121</sup>/BRCA1/BRCA2</i>                         | TgK18G <sup>T121</sup> - Adeno-Cre injection in bursa for floxed alleles (Flesken-Nikitin et al.) | Serous epithelial ovarian carcinomas, metastasis, ascites<br>p53/Brca1 or 2 → tumors<br>p53/Rb → tumors<br>p53/Brca1 or 2/Rb → tumors | More tumors from p53 null than p53 mutant in combination with Brca or Rb. Rb and p53 induced tumors regardless of Brca mutations.                    |
| (Kim et al.) and (Kim et al.) | 2012 | <i>Pten/Dicer</i> and triple knock-out<br><i>Dicer/Pten/p53LSL<sup>R172H/+</sup></i> | MISRII-Cre (Jamin et al.)                                                                         | High-grade serous fallopian tube carcinoma, ascites, metastasis                                                                       | Tumors form in oviductal stroma (double knock-out) independent of p53 or BRCA mutations and in both the ovary and fallopian tube (triple knock-out). |
| (Kinross et al.)              | 2012 | <i>Pten/PI3Kca<sup>H1047R</sup></i>                                                  | Adeno-Cre injection in bursa (Flesken-Nikitin et al.)                                             | Serous adenocarcinoma and granulosa cell tumors                                                                                       | mTor/PI3K inhibitors delayed tumor growth and increased survival.                                                                                    |
| (Mullany et al.)              | 2011 | <i>Pten/K-ras<sup>G12D</sup></i>                                                     | MISRII-Cre (Jamin et al.)                                                                         | Low grade serous ovarian papillary adenocarcinoma                                                                                     | Estrogen increased metastasis.                                                                                                                       |
| (Laviolette et al.)           | 2010 | <i>tgCAG-LS-TAg</i>                                                                  | Adeno-Cre injection in bursa (Flesken-Nikitin et al.)                                             | Poorly differentiated ovarian tumors, ascites, metastasis                                                                             | Estrogen accelerated tumor formation.                                                                                                                |
| (Quinn et al.)                | 2009 | <i>p53/Brca1</i>                                                                     | Adeno-Cre injection in bursa (Flesken-Nikitin et al.)                                             | High grade leiomyosarcomas                                                                                                            | May originate in bursa. Did not display epithelial, follicular or lymphocyte markers.                                                                |
| (Liang et al.)                | 2009 | <i>PIK3ca</i>                                                                        | MISRII-Cre (Jamin et al.)                                                                         | OSE hyperplasia, no transformation                                                                                                    | PIK3CA plus K-ras may induce full transformation.                                                                                                    |
| (Fan et al.)                  | 2008 | <i>Pten/K-ras<sup>G12D</sup></i>                                                     | Pgr-Cre (Soyal et al.)<br>Cyp-19-Cre (Fan et al.)<br>MISRII-Cre (Jamin et al.)                    | Pgr-No granulosa tumors<br>19-Granulosa tumors<br>Pten/K-ras/MISRII-low grade serous tumors                                           | K-ras/Pten deletion in the OSE causes tumors, while in granulosa cells blocks K-ras induced tumors.                                                  |
| (Wu et al.)                   | 2007 | <i>Pten/APC</i>                                                                      | Adeno-Cre injection in bursa (Flesken-Nikitin et al.)                                             | Endometrioid ovarian tumors, ascites, metastasis                                                                                      | Supports beta-catenin and Pten as important in endometrioid histotype from ovarian surface.                                                          |
| (Clark-Knowles et al.)        | 2007 | <i>p53/Brca1/Rb</i>                                                                  | Adeno-Cre injection in bursa (Flesken-Nikitin et al.)                                             | Leiomyosarcomas                                                                                                                       | Brca deficient derived cells displayed greater sensitivity to cisplatin, which was reduced when                                                      |



|                          |      |                                               |                                                                                                           |                                                                                                                          |                                                                                                                                                      |
|--------------------------|------|-----------------------------------------------|-----------------------------------------------------------------------------------------------------------|--------------------------------------------------------------------------------------------------------------------------|------------------------------------------------------------------------------------------------------------------------------------------------------|
|                          |      |                                               |                                                                                                           |                                                                                                                          | p53 or Rb were deleted.                                                                                                                              |
| (Mabuchi et al.)         | 2007 | <i>MISRII-TAg</i>                             | MISRII (Jamin et al.)                                                                                     | Poorly differentiated carcinoma with occasional cysts and papillary structures on ovarian surface, metastasis, ascites   | Testing of everolimus (mTor inhibitor) as a targeted treatment in a GEMM. Tumor burden reduced by 84%.                                               |
| (Xing et al.)            | 2006 | <i>p53/Brca/c-myc</i>                         | Mouse OSE derived cell lines from TVA engineered mouse infected with specific retrovirus (Orsulic et al.) | Serous ovarian carcinoma, metastasis                                                                                     | Brca1 deficient platinum sensitive. Brca1 deficient and wild-type had similar sensitivity to paclitaxel.                                             |
| (Xing et al.)            | 2005 | <i>p53/c-myc/K-ras<sup>G12D</sup>/myr-Akt</i> |                                                                                                           | Papillary serous carcinoma (p53/myc/K-ras or p53/myc/Akt) or poorly differentiated carcinoma (p53/K-ras/Akt), metastasis | Rapamycin inhibited cells with activated Akt. Rapamycin reduced VEGF. MEK1/2 inhibitors + rapamycin were better than single agents <i>in vitro</i> . |
| (Orsulic et al.)         | 2002 | <i>p53/Brca1</i>                              |                                                                                                           | Ovarian papillary serous carcinoma, metastasis                                                                           | p53 deletion combined with any two oncogenes (c-myc, K-ras, or Akt) can induce ovarian tumor formation from mouse OSE.                               |
| (Dinulescu et al.)       | 2005 | <i>Pten/ K-ras<sup>G12D</sup></i>             | Adeno-Cre injection in bursa (Flesken-Nikitin et al.)                                                     | Endometriosis (K-ras)<br>Endometrioid ovarian cancer (Pten/K-ras), metastasis, ascites                                   | Defined genetic events can induce both endometriosis and endometrioid ovarian cancer.                                                                |
| (Liu et al.)             | 2004 | <i>hTERT/SV40/Hras/K-ras</i>                  | Human OSE derived cell lines with stable expression of vectors (Liu et al. 2004)                          | Undifferentiated carcinoma or malignant mixed Müllerian (from all genes combined) tumor, metastasis, ascites             | Cells expressed CA125 and NFκB mediated cytokine expression.                                                                                         |
| (Connolly et al.)        | 2003 | <i>MISRII-TAg</i>                             | MISRII (Jamin et al.)                                                                                     | Poorly differentiated carcinoma with occasional cysts and papillary structures on ovarian surface, metastasis, ascites   | No reported tumor involvement in oviduct or uterus despite expression of MISRII in these tissues.                                                    |
| (Flesken-Nikitin et al.) | 2003 | <i>p53/Rb</i>                                 | Adeno-Cre injection in bursa                                                                              | Serous epithelial neoplasms (39% p53/Rb) or poorly differentiated (p53 alone and 45% p53/Rb), metastasis, ascites        | First reported use of intrabursal adenoviral injection for delivery of cre-recombinase.                                                              |
| (Miyoshi et al.)         | 2002 | <i>OVGP1-Tag</i>                              | OVGP1-Cre                                                                                                 | Tumorigenesis of the oviduct, uterus, and vagina                                                                         | Despite TAg expression in the ovary, no tumors were found. Promoter strongly relies on estrogen signaling.                                           |

## References

1. Wu, R. et al., 2013, Type I to type II ovarian carcinoma progression mutant Trp53 or PIK3CA confers a more aggressive tumor phenotype in a mouse model of ovarian cancer: *American Journal of Pathology*, v. 182, no. 4, p. 1391-1399.
2. Flesken-Nikitin, A. et al., 2003, Induction of carcinogenesis by concurrent inactivation of p53 and Rb1 in the mouse ovarian surface epithelium: *Cancer Research*, v. 63, p. 3459-3463.
3. Szabova, L. et al., 2012, Perturbation of RB, p53 and Brca1 or Brca2 cooperate in inducing metastatic serous epithelial ovarian cancer: *Cancer Research*, v. 72, no. 16, p. 4141-4153.
4. Kim, J. et al., 2012, High-grade serous ovarian cancer arises from fallopian tube in a mouse model: *Proceedings of the National Academy of Sciences USA*, v. 109, no. 10, p. 3921-3926.
5. Kim, J. et al., 2013, A p53 activating mutation accelerates the progression of high-grade serous ovarian cancer arising in the fallopian tube: *AACR Annual Meeting*, v. Abstract #328.
6. Jamin, S. P. et al., 2002, Requirement of Bmpr1a for Müllerian duct regression during male sexual development: *Nature Genetics*, v. 32, p. 408-412.
7. Kinross, K. M. et al., 2012, An activating Pik3ca mutation coupled with Pten loss is sufficient to initiate ovarian tumorigenesis in mice: *Journal of Clinical Investigation*, v. 122, no. 2, p. 553-557.
8. Mullany, L. K. et al., 2011, Molecular and function characteristics of ovarian surface epithelial cells transformed by KrasG12D and loss of Pten in mouse model *in vivo*: *Oncogene*, v. 30, p. 3522-3536.
9. Laviolette, L. A. et al., 2010, 17 beta-estradiol accelerates tumor onset and decreases survival in a transgenic mouse model of ovarian cancer: *Endocrinology*, v. 151, no. 3, p. 929-938.
10. Quinn, B. A. et al., 2009, Induction of ovarian leiomyosarcomas in mice by conditional inactivation of Brca1 and p53: *PloS One*, v. 4, no. 12, p. e8404.
11. Liang, S. et al., 2009, Expression of activated PIK3CA in ovarian surface epithelium results in hyperplasia but not tumor formation: *PloS One*, v. 4, no. 1, p. 1-9.
12. Fan, H. Y. et al., 2008, Selective expression of Kras<sup>G12D</sup> in granulosa cells of the mouse ovary causes defects in follicle development and ovulation: *Development*, v. 135, p. 2127-2137.
13. Soyal, S.M. et al., 2005, Cre-mediated recombination in cell lineages that express the progesterone receptor: *Genesis*, v. 41, p. 58-66.
14. Wu, R. et al., 2007, Mouse model of human ovarian endometrioid adenocarcinoma based on somatic defects in the Wnt/ $\beta$ -catenin and PI3K/Pten signaling pathways: *Cancer Cell*, v. 11, p. 321-333.
15. Clark-Knowles, K. et al., 2007, Conditional inactivation of Brca1 in the mouse ovarian surface epithelium results in an increase in preneoplastic changes: *Experimental Cell Research*, v. 313, p. 133-145.
16. Mabuchi, S. et al., 2007, RAD001 (Everolimus) delays tumor onset and progression in a transgenic mouse model of ovarian cancer: *Cancer Research*, v. 67, no. 6, p. 2408-2414.
17. Xing, D., and S. Orsulic, 2006, A mouse model for the molecular characterization of BRCA1-associated ovarian carcinoma: *Cancer Research*, v. 66, no. 18, p. 8949-8953.
18. Orsulic, S. et al., 2002, Induction of ovarian cancer by defined multiple genetic changes in a mouse model system: *Cancer Cell*, v. 1, no. February, p. 53-62.
19. Xing, D., and S. Orsulic, 2005, A genetically defined mouse ovarian carcinoma model for the molecular characterization of pathway-targeted therapy and tumor resistance: *Proceedings of the National Academy of Sciences USA*, v. 102, no. 19, p. 6936-6941.
20. Dinulescu, D. et al., 2005, Role of K-ras and PTEN in the development of mouse models of endometriosis and endometrioid ovarian cancer: *Nature Medicine*, v. 11, no. 1, p. 63-70.
21. Liu, J. et al., 2004, A genetically defined model of human ovarian cancer: *Cancer Research*, v. 64, p. 1655-1663.
22. Connolly, D. et al., 2003, Female mice chimeric for expression of the simian virus 40 TAg under control of the MISIIIR promoter develop epithelial ovarian cancer: *Cancer Research*, v. 63, p. 1389-1397.
23. Miyoshi, I. et al., 2013, Mouse transgenic for murine oviduct-specific glycoprotein promoter-driven simian virus 40 large t-antigen: tumor formation and its hormonal regulation: *Molecular Reproduction and Development*, v. 63, p. 168-176.
